# Supplementary material
Source: PubMed Central journal article supplement (PMC4227547)

# LC-MS/MS Quantitation of Esophagus Disease Blood Serum Glycoproteins by Enrichment with Hydrazide Chemistry and Lectin Affinity Chromatography

*Ehwang Song<sup>1</sup>, Rui Zhu<sup>1</sup>, Zane Hammoud<sup>2</sup>, and Yehia Mechref<sup>1\*</sup>*

<sup>1</sup>Department of Chemistry and Biochemistry, Texas Tech University, Lubbock, TX 79409

<sup>2</sup> Cardiothoracic Surgery, Henry Ford Hospital, Detroit, MI USA 48202

\*Corresponding authors

Email: [yehia.mechref@ttu.edu](mailto:yehia.mechref@ttu.edu)

Tel: 806-742-3059

Fax: 806-742-1289

**Keywords:** Glycoproteins, Lectin Chromatography, Hydrazide-Chemistry Enrichment, LC-MS/MS, Quantitative Glycoproteomics

**Supplementary Figure 1.** Number of identified glycoproteins (A) and identified unique peptides (B) between DF, HGD, and EAC by lectin affinity chromatographic enrichment.

A. Identified proteins

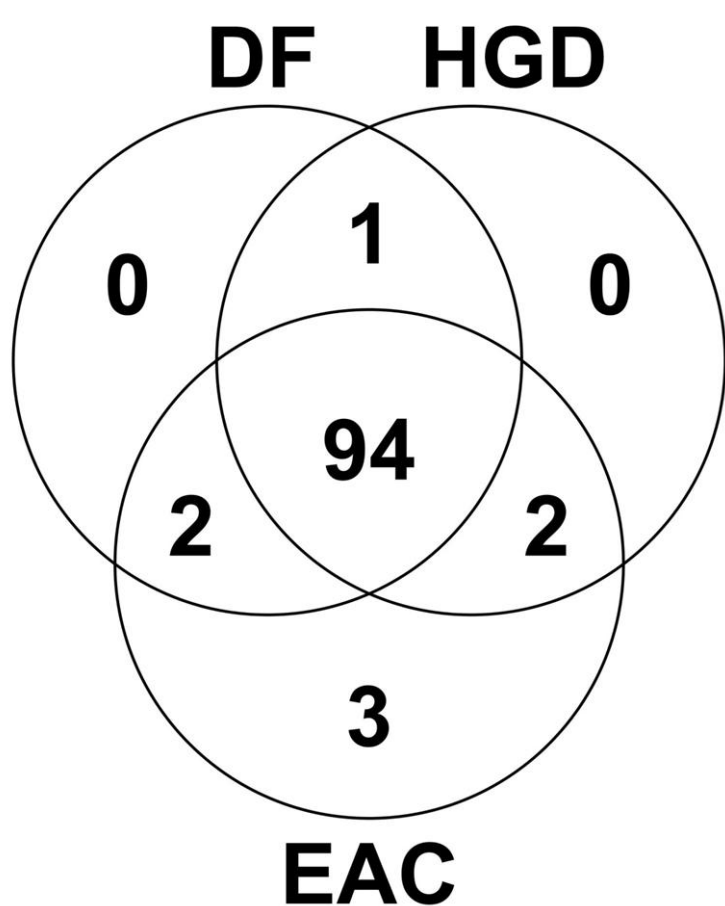

B. Unique peptides

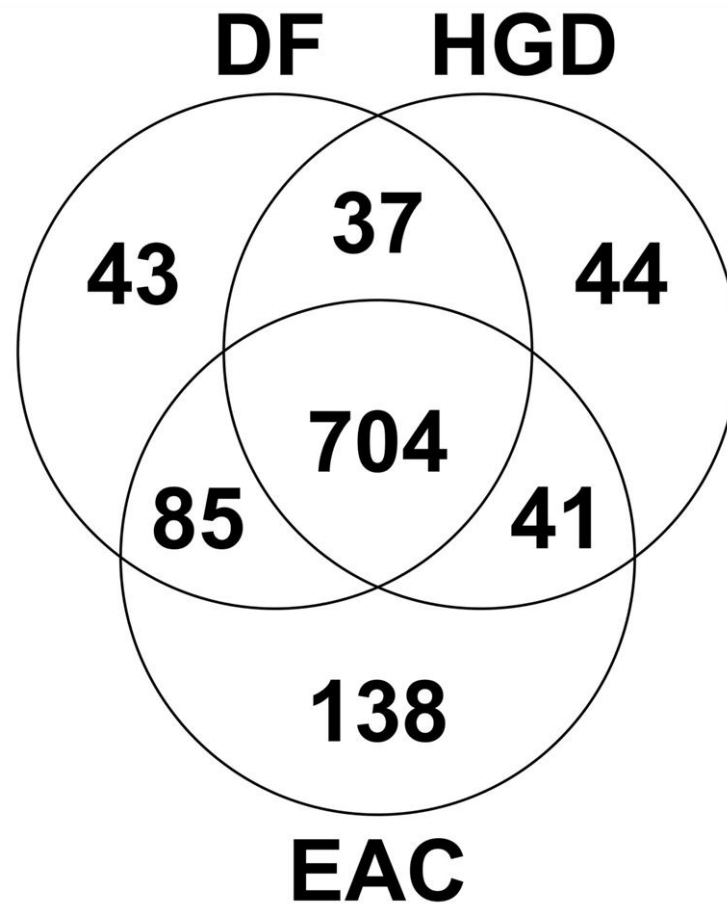

**Supplementary Figure 2.** Number of identified glycoproteins (A) and identified unique peptides (B) between DF, HGD, and EAC using hydrazide chemistry-based enrichment.

A. Identified proteins

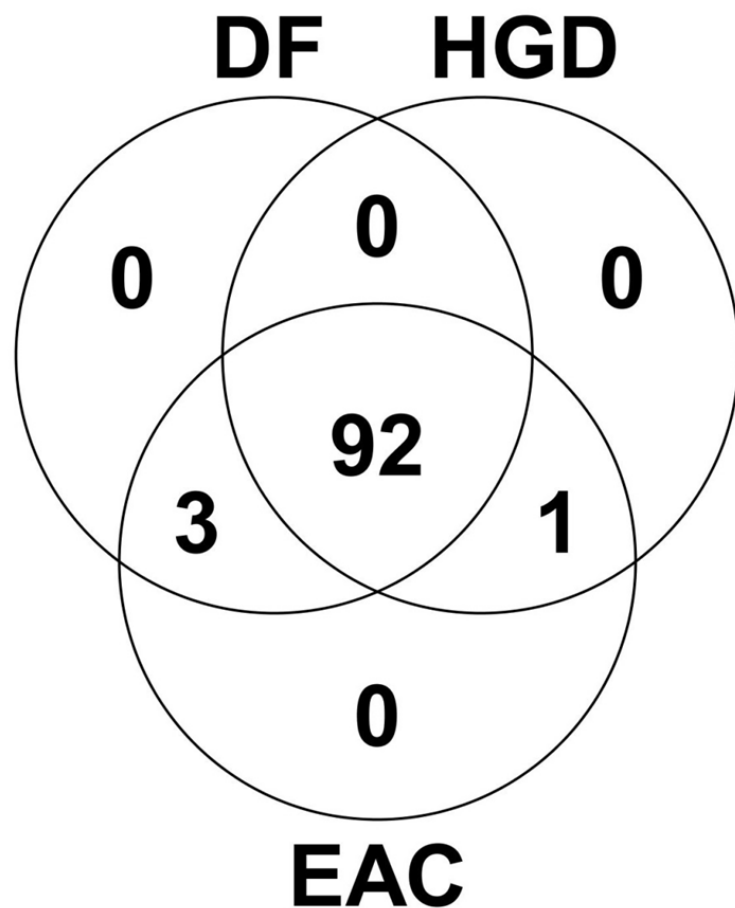

B. Unique peptides

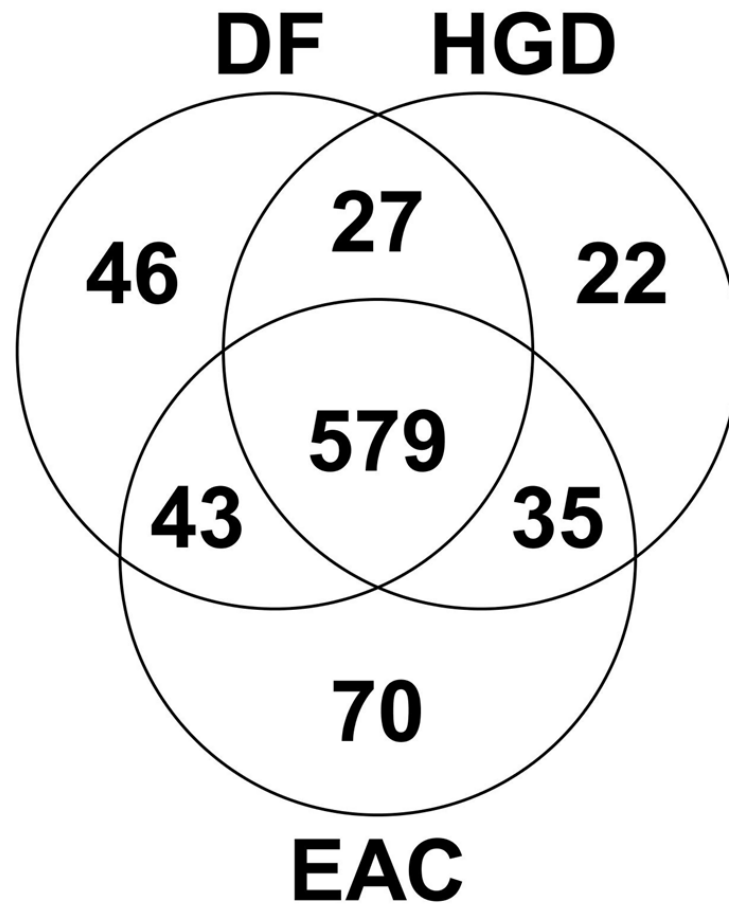

**Supplementary Figure 3.** Comparisons of number of identified glycoproteins from LC-ESI-MS/MS.

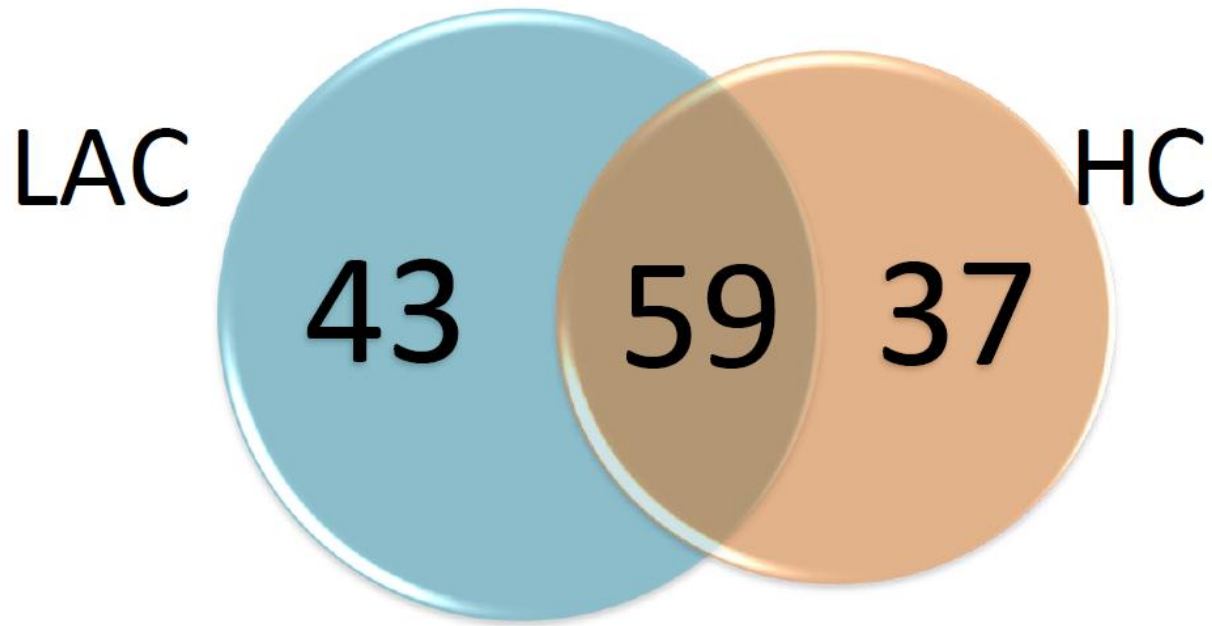

# Supplementary Figure 4A. Gene ontology for biological process from identified glycoproteins enriched by lectin affinity chromatographic enrichment.

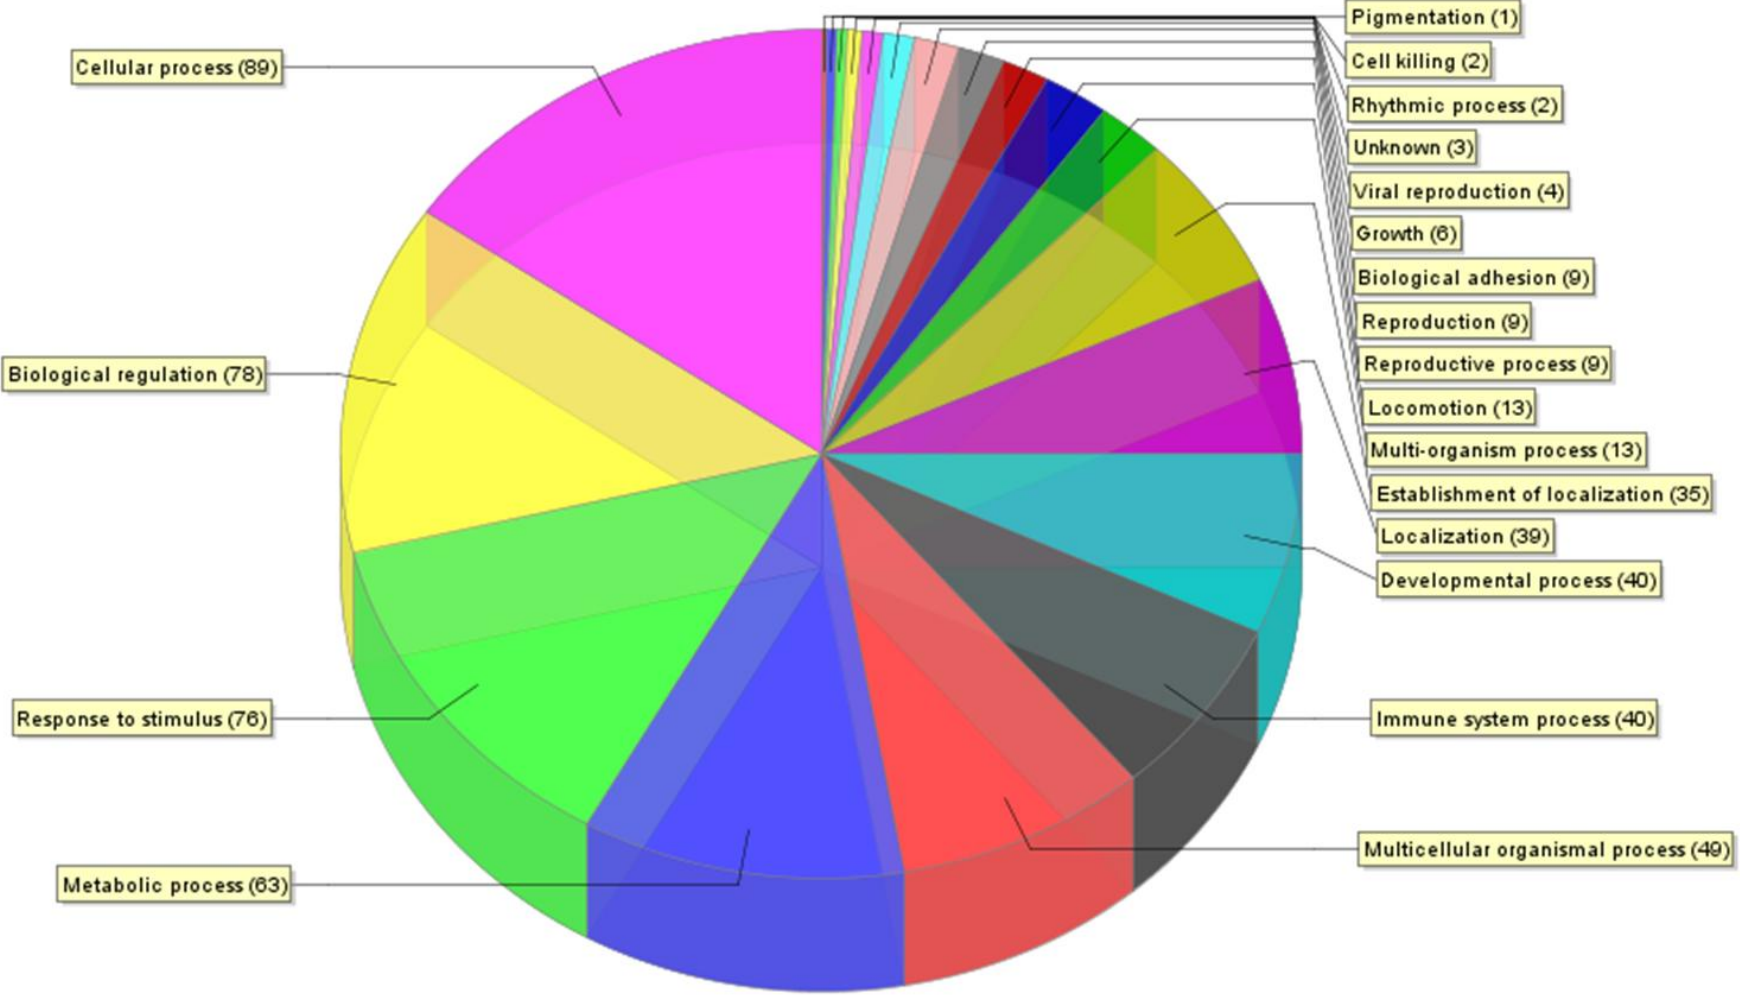

# Supplementary Figure 4B. Gene ontology for biological process from identified glycoproteins enriched by hydrazide chemistry.

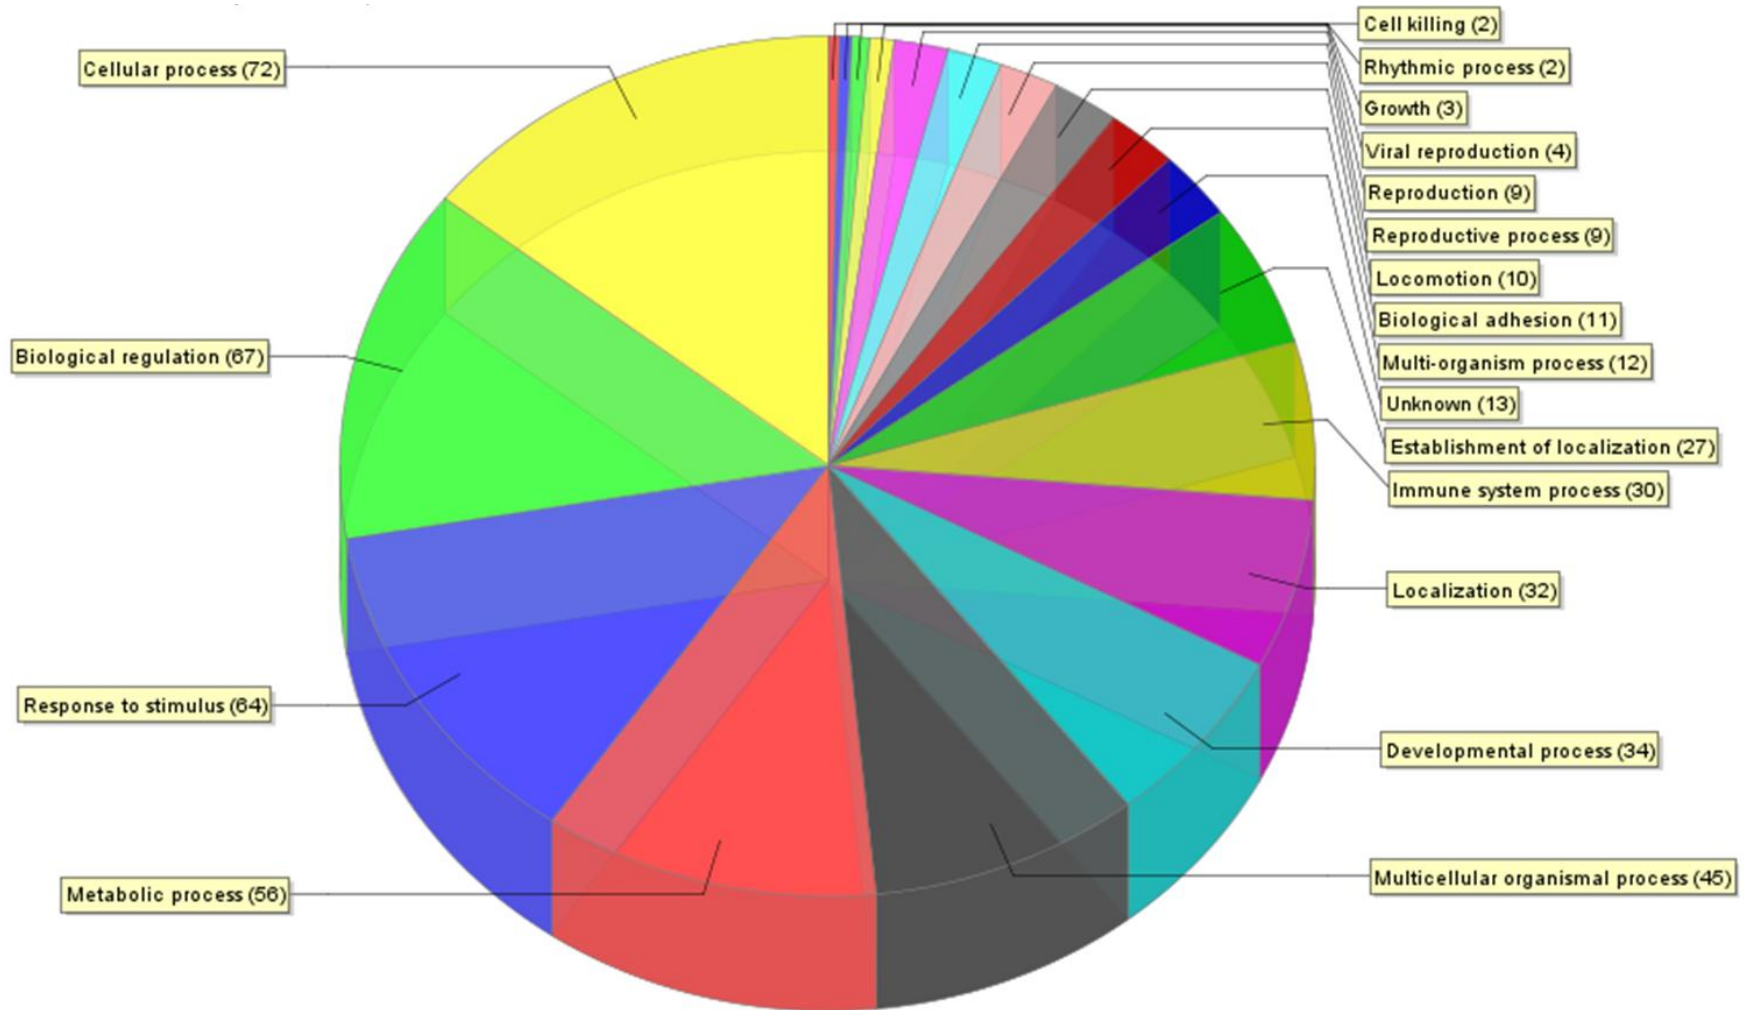

**Supplementary Figure 5A.** Gene ontology for cellular component from identified glycoproteins enriched by lectin affinity chromatographic enrichment.

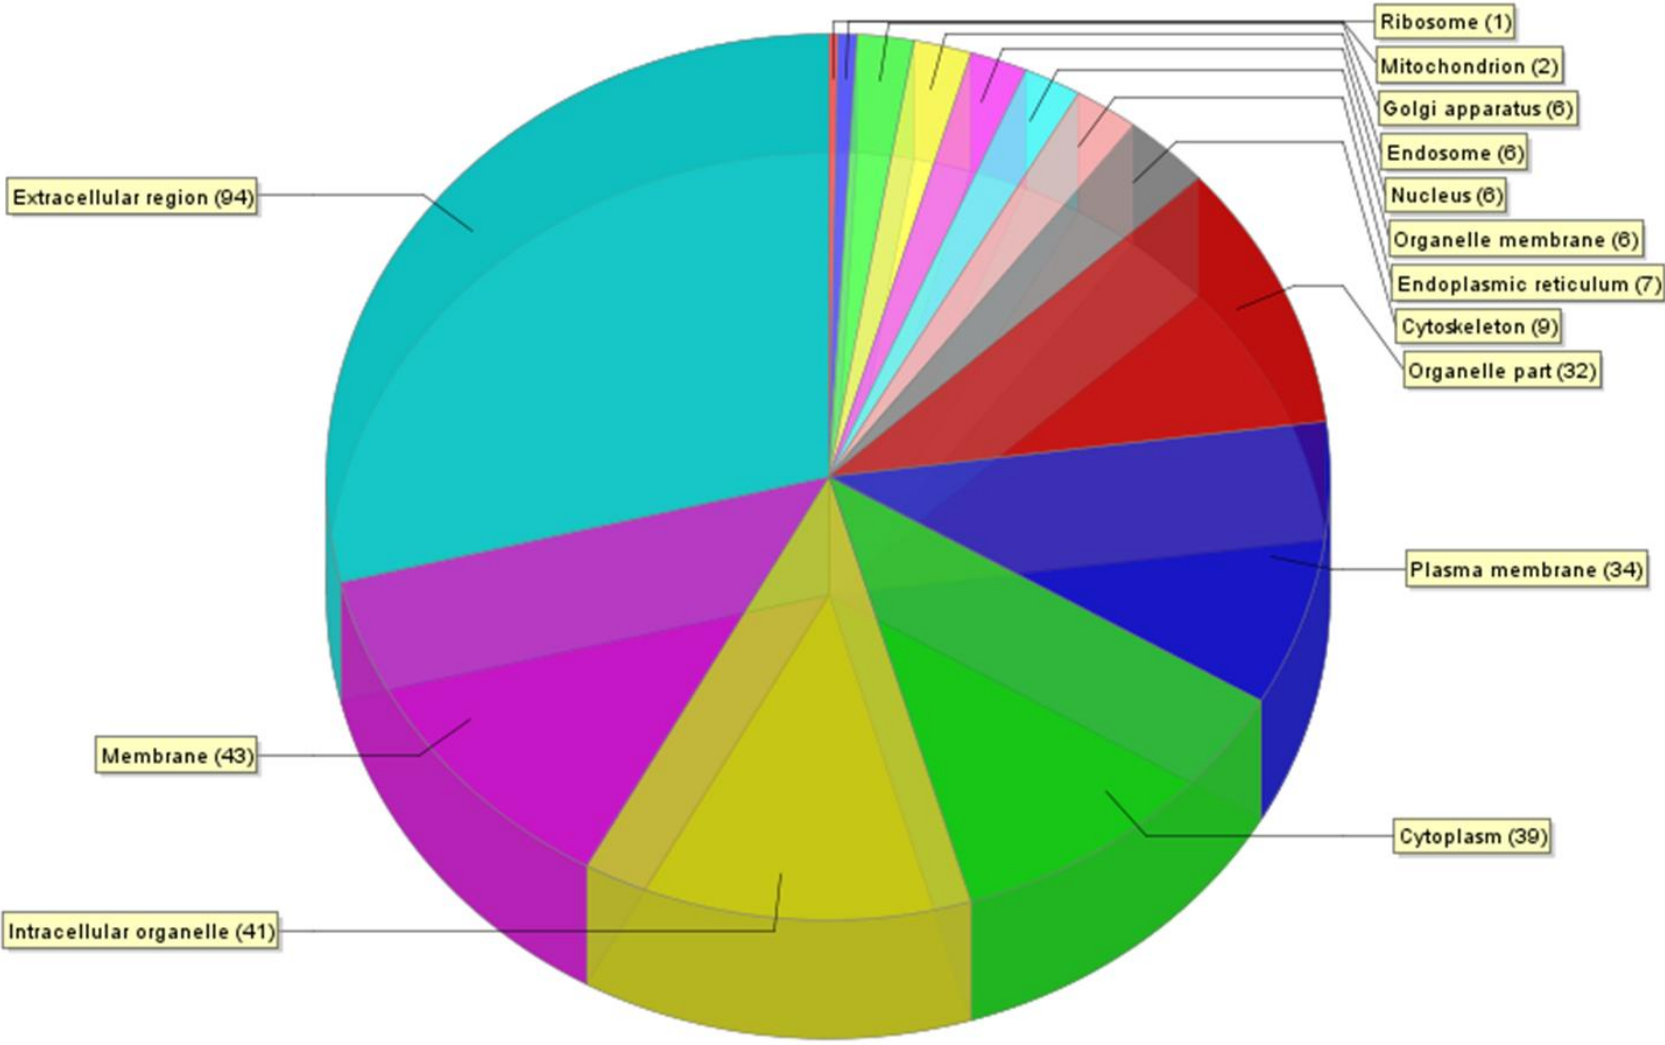

# Supplementary Figure 5B. Gene ontology for cellular component from identified glycoproteins enriched by hydrazide chemistry

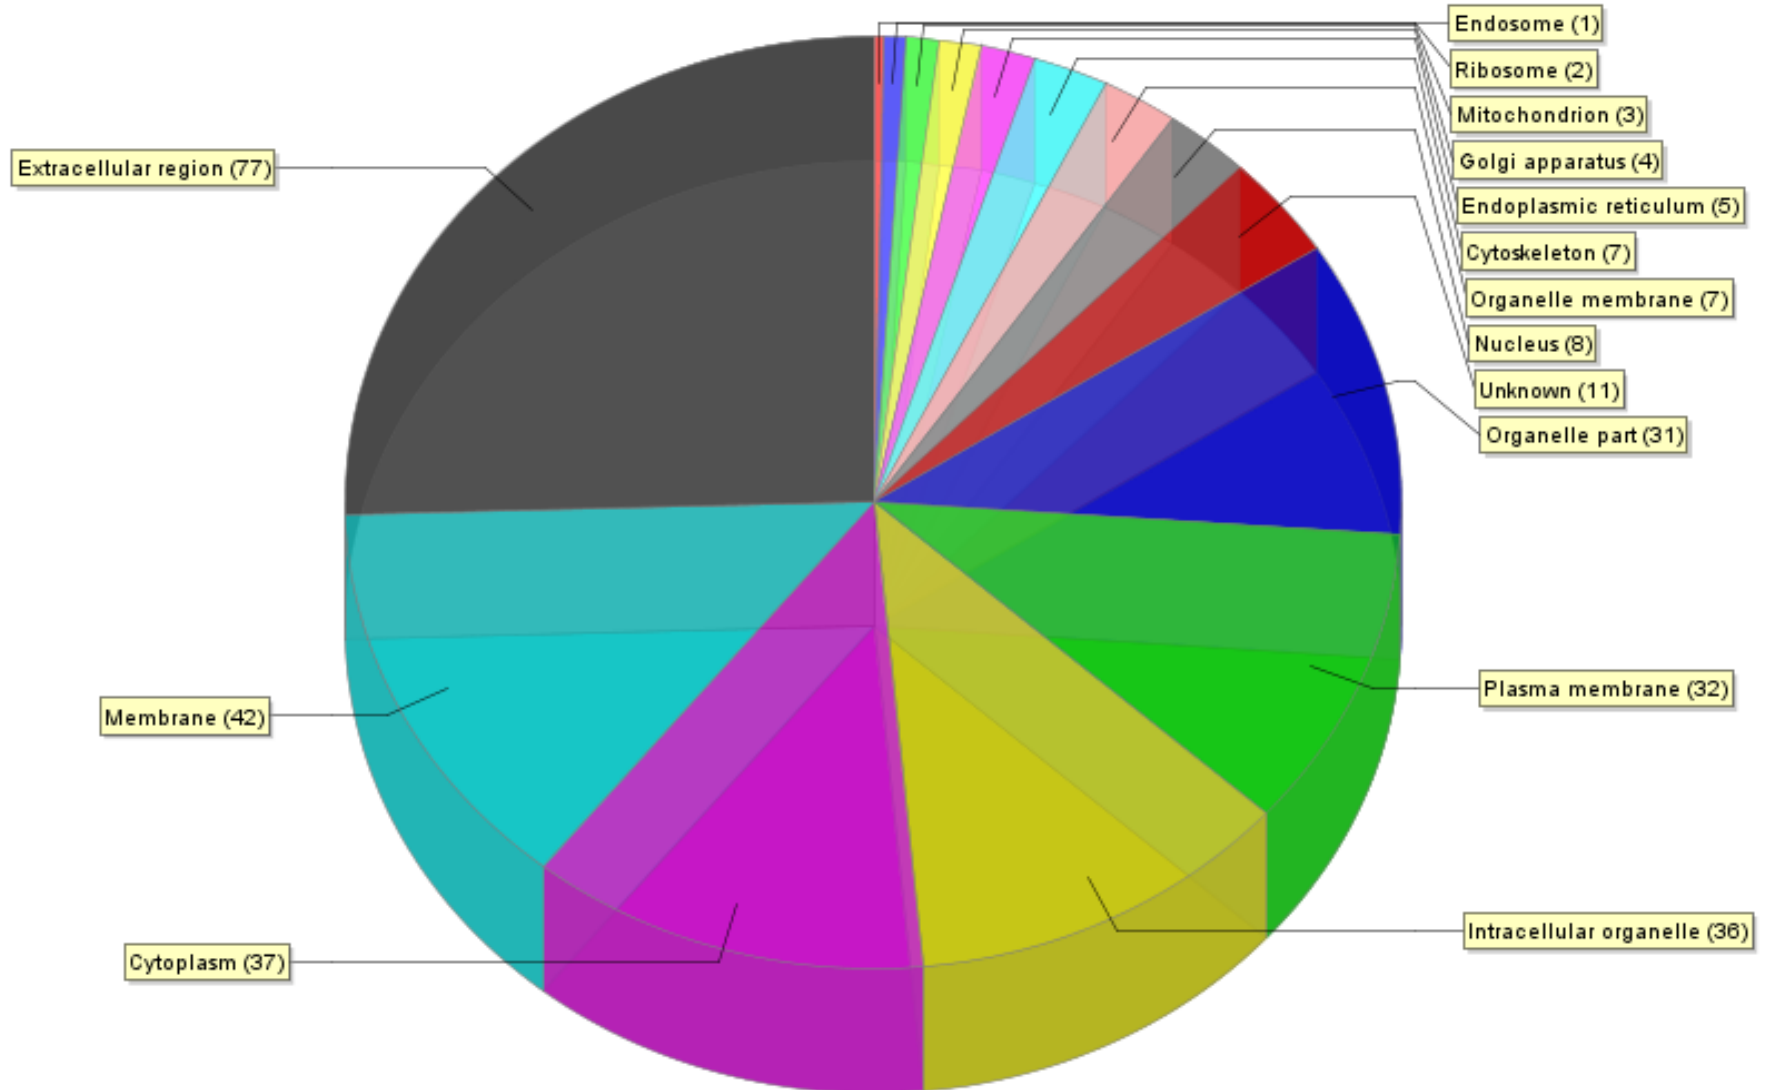



**Supplementary Figure 6.** Comparisons of number of targeted glycoproteins (A) and glycosylation sites (B) for MRM experiments and statistical evaluation.

A. Number of glycoproteins  
between LAC and HC

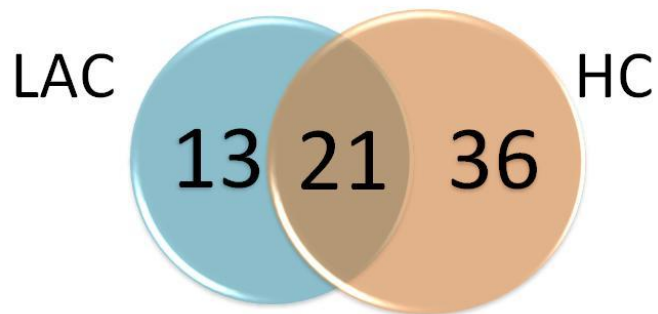

B. Number of glycosylation sites  
between LAC and HC

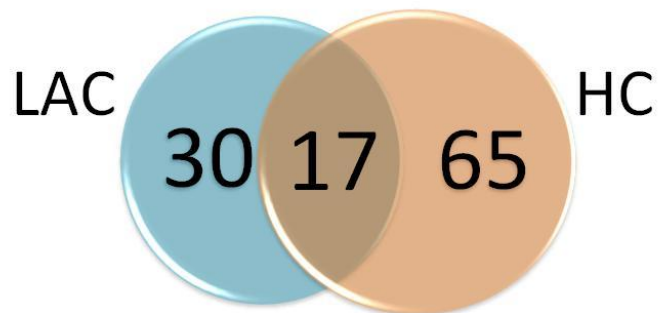

Supplement: pr500570m_si_002.pdf [file pr500570m_si_002.pdf]
